# Supplementary material for: Circ_0003998 Regulates the Progression and Docetaxel Sensitivity of DTX-Resistant Non-Small Cell Lung Cancer Cells by the miR-136-5p/CORO1C Axis
Source: PubMed Central journal article supplement — Technol Cancer Res Treat. 2021 Jan 29;20:1533033821990040. doi: 10.1177/1533033821990040 (PMC7871354; doi:10.1177/1533033821990040), 2021-01-29
Supplement: sj-pdf-1-tct-10.1177_1533033821990040.pdf [file sj-pdf-1-tct-10.1177_1533033821990040.pdf]

**Table 1. Sequences of PCR primers and oligonucleotides**

|                      |         | Sequence (5'-3')        |
|----------------------|---------|-------------------------|
| Circ_0003998         | Forward | CAGGAGGTGGTGAAGGACAT    |
|                      | Reverse | CGAACGAACTTTGGGGATAC    |
| CORO1C               | Forward | CTTTGCAGCGGGGACTTCG     |
|                      | Reverse | CGTTATGTGGGCACCAGTCT    |
| $\beta$ -actin       | Forward | CTCGCCTTTGCCGATCC       |
|                      | Reverse | GGGGTACTTCAGGGTGAGGA    |
| miR-136-5p           | Forward | GCCGAGGUUUUGUUUACCUCA   |
|                      | Reverse | CAGTGCGTGTTCGTGGAGT     |
| U6                   | Forward | CTCGCTTCGGCAGCACA       |
|                      | Reverse | AACGCTTCACGAATTTGCGT    |
| si-circ_0003998      |         | UUCAAACGAACGAACUUUGGG   |
| si-NC                |         | AAGACAUUGUGUGUCCGCCTT   |
| miR-136-5p mimic     |         | AGGUAGUAGUUUUGUUUACCUCA |
| mimic NC             |         | CGAUCGCAUCAGCAUCGAUUGC  |
| miR-136-5p inhibitor |         | UGAGGUAAACAAAACUACUACCU |
| inhibitor NC         |         | CUAACGCAUGCACAGUCGUACG  |
